# Supplementary material
Source: HighWire-hosted journal article supplement (https://bjo.bmj.com/content/105/9/1272)
Supplement: inline-supplementary-material-2 [file inline-supplementary-material-2.pdf]

## Supplemental Figure 2: The detailed filtration/selection flow of the examined images

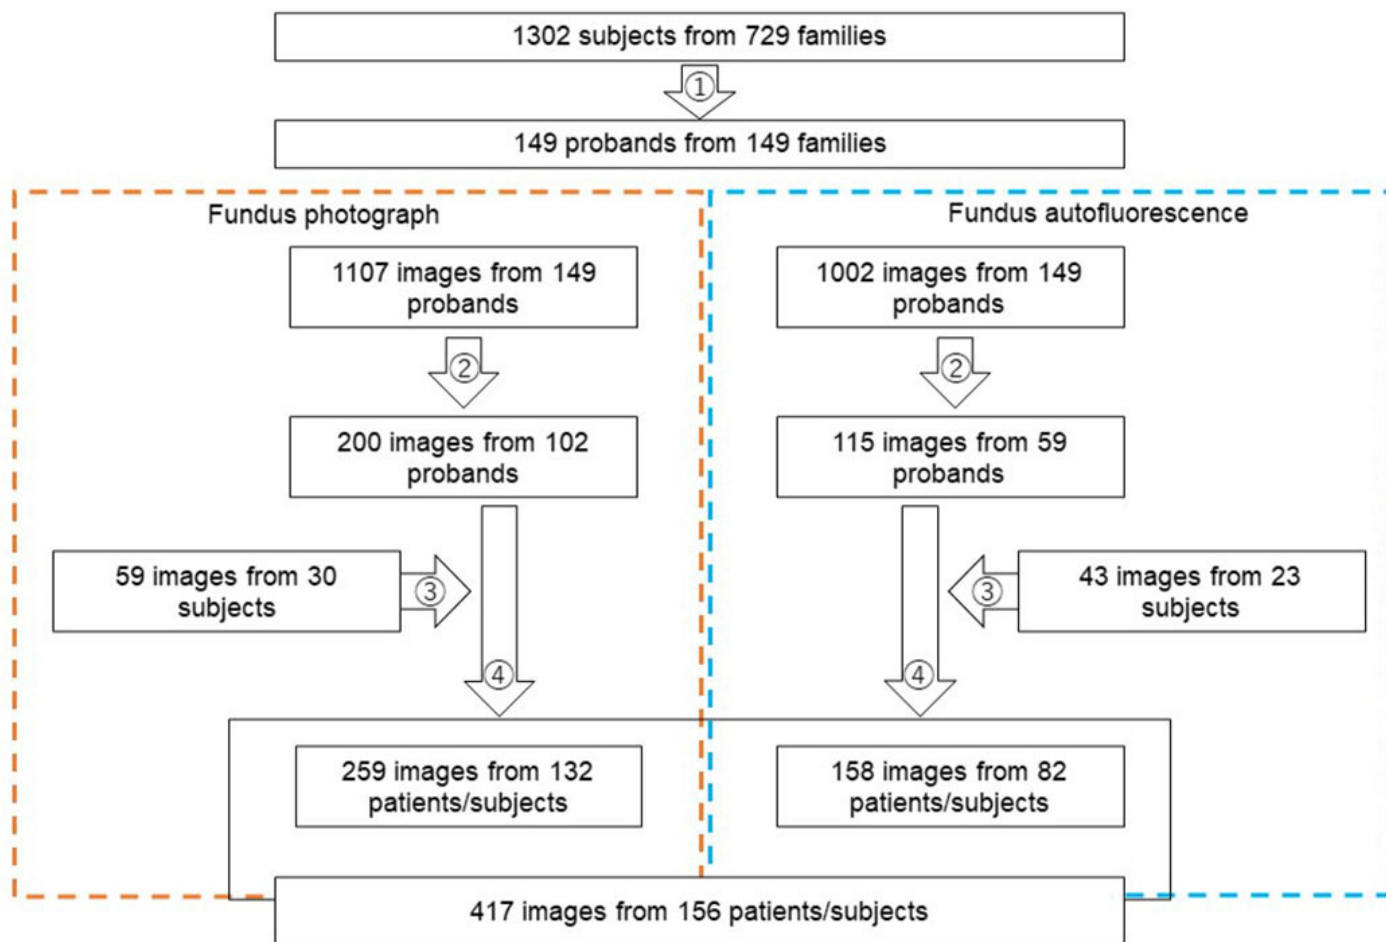

The filtration/selection process include ① selecting three genes (*ABCA4*, *EYS*, *RP11L1*) based on the disease prevalence, ② selecting one image from one eye by an expert, ③ selecting normal images by an expert (excluding images with inadequate dataset/quality), and ④ fixing the dataset for machine learning.
